# Supplementary material for: The copolymerization reactivity of diols with 2,5-furandicarboxylic acid for furan-based copolyester materials
Source: Royal Society of Chemistry journal article supplement (doi:10.1039/c2jm15457a), 2012-01-01
Supplement: c2jm15457a.pdf [file c2jm15457a.pdf]

*Supporting information for*

## **The copolymerization reactivity of diols with 2,5-furandicarboxylic acid for furan-based copolyester materials**

Jiping Ma,<sup>abc</sup> Yi Pang,<sup>\*a</sup> Min Wang,<sup>bc</sup> Jie Xu,<sup>\*b</sup> Hong Ma,<sup>b</sup> and Xin Nie<sup>b</sup>

<sup>a</sup> *Department of Chemistry, The University of Akron, Akron, OH, 44325, USA*

*E-mail: yp5@uakron.edu*

<sup>b</sup> *Dalian National Lab for Clean Energy, State Key Laboratory of Catalysis, Dalian Institute of Chemical Physics, Chinese Academy of Sciences, Dalian, 116023, P. R. China*

*Fax: (+86)-411-84379245; E-mail: xujie@dicp.ac.cn*

<sup>c</sup> *Graduate University of the Chinese Academy of Sciences, Beijing 100039, P. R. China*

### **Table of Contents:**

- 1. Synthesis of 2,5-furandicarboxylic acid (FDCA) (pp.2-4).**
- 2. Intrinsic viscosity determination (pp.5-8).**
- 3. Reactivity of diols reaction with FDCA determination (pp.9-14).**
- 4. Thermal properties determination (pp.15-20).**

## 1. Synthesis of 2,5-furandicarboxylic acid (FDCA).

### *Chemicals*

NaOH was purchased from Aldrich.  $\text{KMnO}_4$  was from Acros Organics. HCl (37%) was purchased from Mallinckrodt Baker, Inc. All reagents were of analytical grade unless otherwise mentioned and used as received.

### *Procedure*

DFP (1.99 g, 16.07 mmol) and 50 mL  $\text{H}_2\text{O}$  was placed in a 250 mL round-bottom flask equipped with a magnetic stirrer. A solution of  $\text{KMnO}_4$  (3.90 g, 24.65 mmol) in 50 mL of 10% aq. NaOH was added dropwise with stirring over a period of 0.5 h. Then, the mixture was allowed to stir for an additional 1 h at room temperature, and the resulting precipitate was removed by filtration. The filtrate was treated with a 37% HCl solution until  $\text{PH} = 1$  or less. A pale yellow solid (1.95 g, 78%) was isolated by suction filtration, washed with water, and dried.  $^1\text{H}$  NMR (300 MHz,  $\text{DMSO-}d_6$ , 298K): 13.63 (2H, s, -COOH), 7.29 (2H, s, furan-H);  $^{13}\text{C}$  NMR: 158.92 (-COOH), 147.07 (C2/C5), 118.40 (C3/C4). FT-IR (KBr,  $\nu_{\text{max}}/\text{cm}^{-1}$ ): 3152 and 3126 (C-H); 1693 (C=O); 1573 (C=C); 1423 and 1275 (furan C-O-C); 1040, ring breathing; 961, 851, and 763 bending motions associated with the 2,5-disubstituted furan ring.

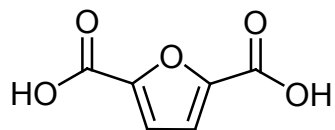

**Figure S1.**  $^1\text{H}$  NMR ( $\text{DMSO-}d_6$ ) of 2,5-furandicarboxylic acid.

**Figure S2.**  $^{13}\text{C}$  NMR ( $\text{DMSO-}d_6$ ) of 2,5-furandicarboxylic acid.

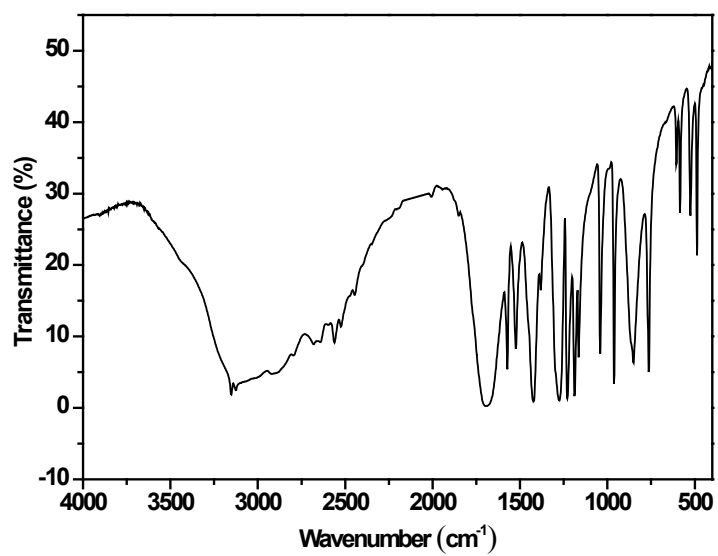

**Figure S3.** FT-IR (KBr) of 2,5-furandicarboxylic acid.

## 2. Intrinsic viscosity determination

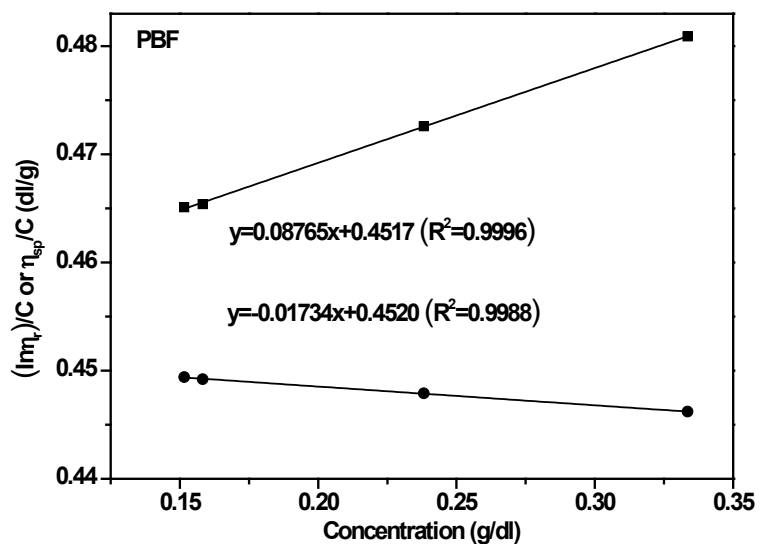

Figure S4.  $\eta_{sp}/C$  (■) or  $(\ln\eta_r)/C$  (●) of PBF versus concentration.

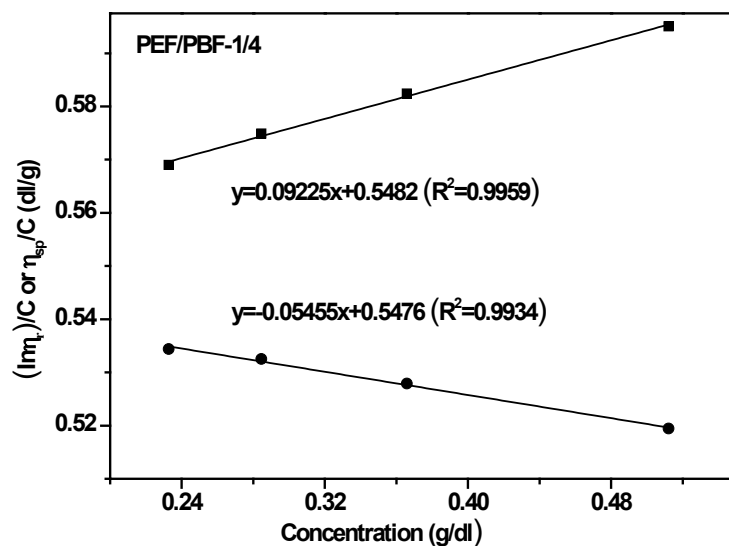

Figure S5.  $\eta_{sp}/C$  (■) or  $(\ln\eta_r)/C$  (●) of PEF/PBF-1/4 versus concentration.

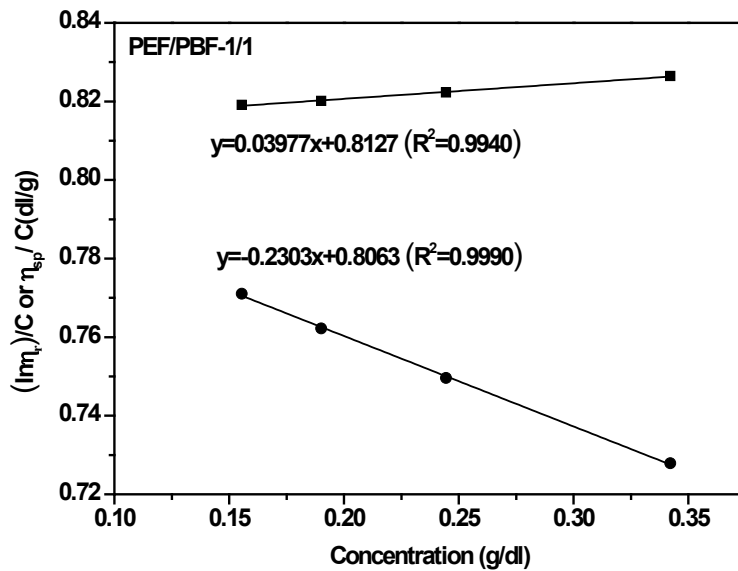

Figure S6.  $\eta_{sp}/C$  (■) or  $(Im_r)/C$  (●) of PEF/PBF-1/1 versus concentration.

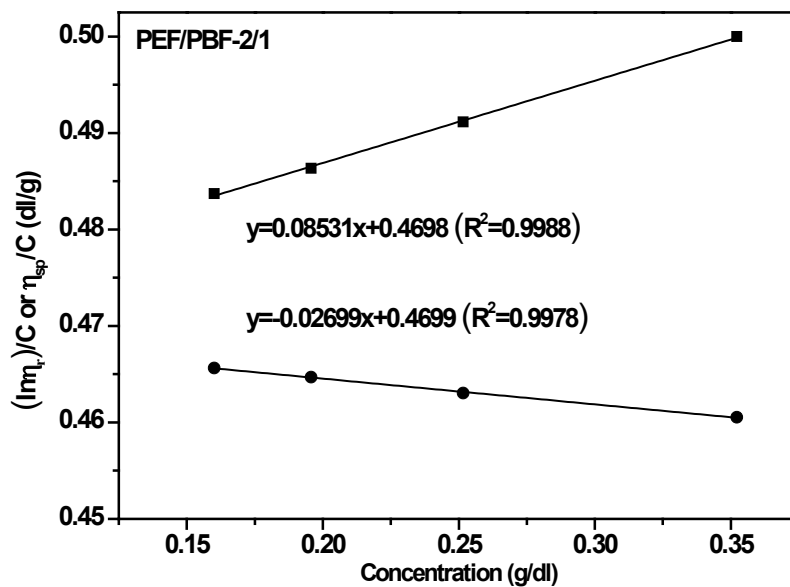

Figure S7.  $\eta_{sp}/C$  (■) or  $(Im_r)/C$  (●) of PEF/PBF-2/1 versus concentration.

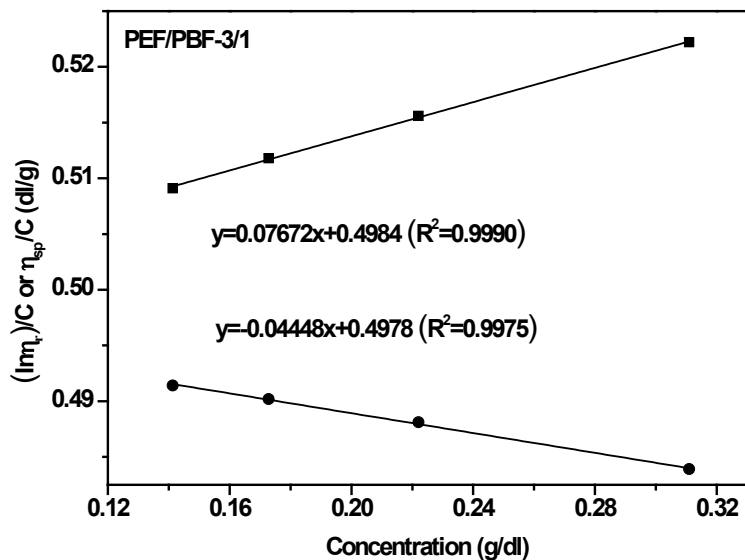

Figure S8.  $\eta_{sp}/C$  (■) or  $(Im_r)/C$  (●) of PEF/PBF-3/1 versus concentration.

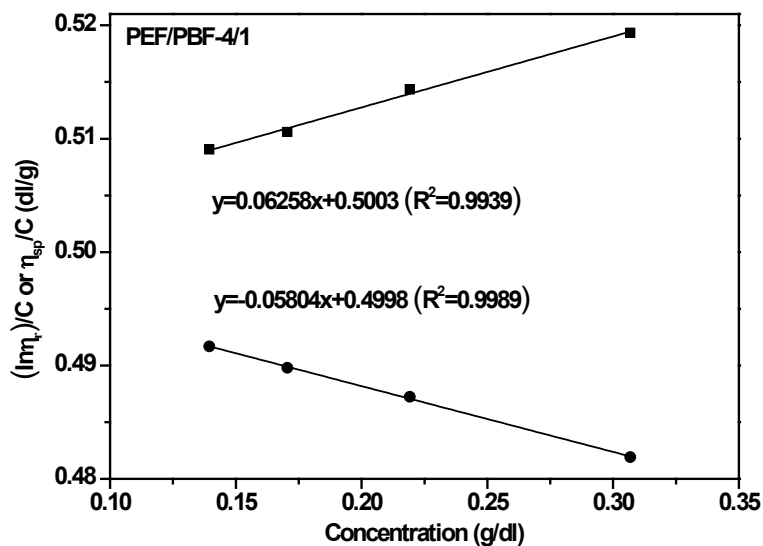

Figure S9.  $\eta_{sp}/C$  (■) or  $(Im_r)/C$  (●) of PEF/PBF-4/1 versus concentration.

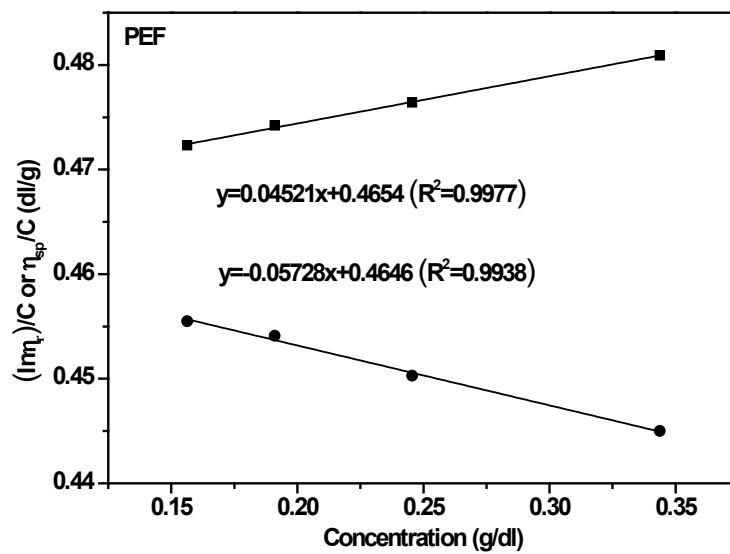

Figure S10.  $\eta_{sp}/C$  (■) or ( $Im_r$ )/C (●) of PEF versus concentration.



### 3. Reactivity of diols reaction with FDCA determination

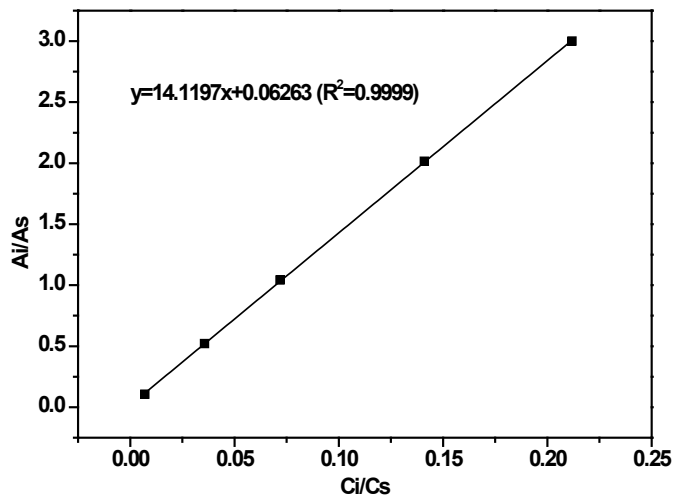

Figure S11. Standard line of FDCA using malonic acid as internal standard.

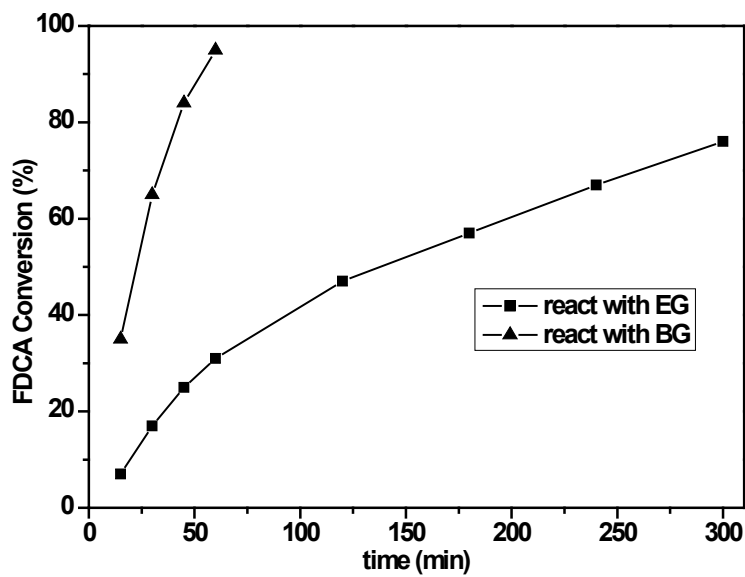

Figure S12. Plot of FDCA conversion as a function of reaction time.

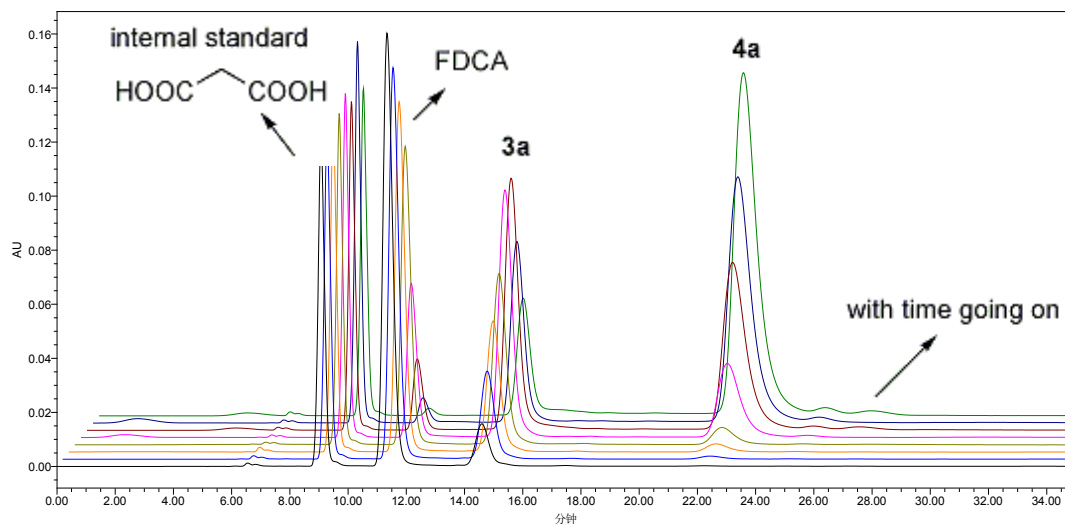

**Figure S13.** Changes of HPLC spectra of FDCA reaction with EG as a function of reaction time (The first samples were taken after 15 min, and then at 15-min intervals for 60 min, and then at 1-h intervals for 5 h).

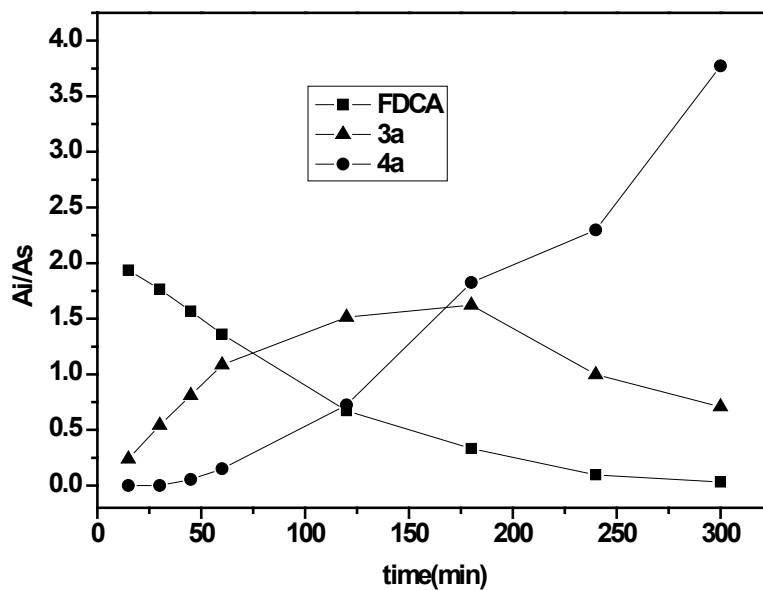

**Figure S14.** Plot of area ratio of FDCA, 3a and 4a to that of internal standard as a function of reaction time.

**ESI-MS:** Q-TOF Premier MS (Waters Corporation) using the ESI emitters. The MS was operated in positive V-mode with typical resolving power of at least 8000. The MS detector was calibrated from  $m/z$  50 to 1000 by the MS/MS fragment ions of GFP. The radio frequency (RF) offset applied to the quadrupole mass analyzer was adjusted in order that the LC/MS data were effectively acquired from  $m/z$  50 to 1000. The spectrum integration time was 0.9 s for MS scan ( $m/z$  50–1000) and 1.2 s for MS/MS scan ( $m/z$  50–1000) with an inter-scan delay time of 0.05 s.

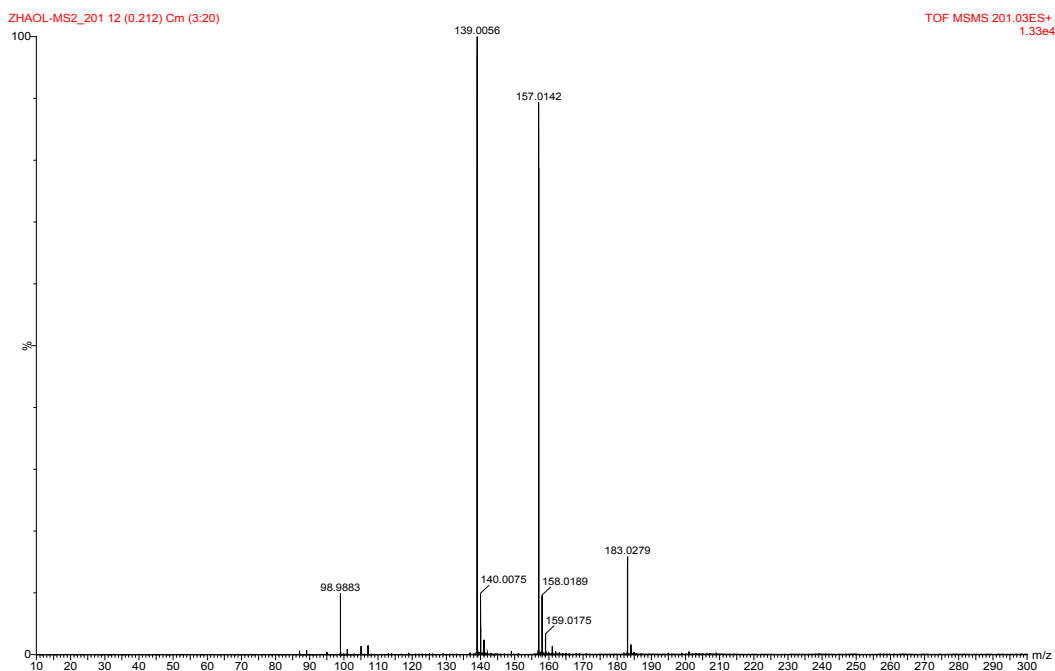

**Figure S15.** ESI-MS spectrum of **3a**.

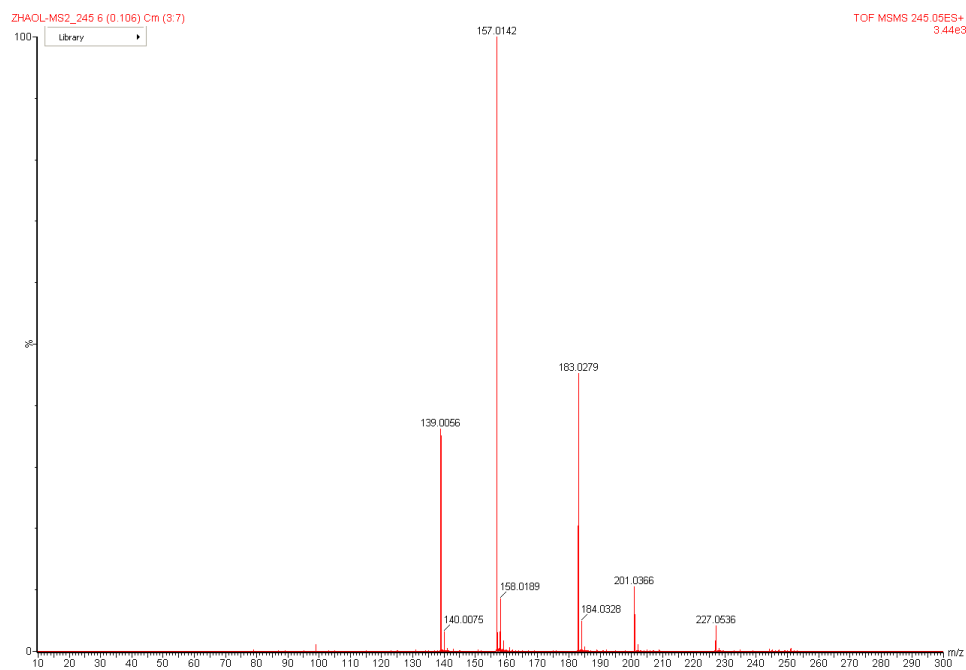

Figure S16. ESI-MS spectrum of 4a.

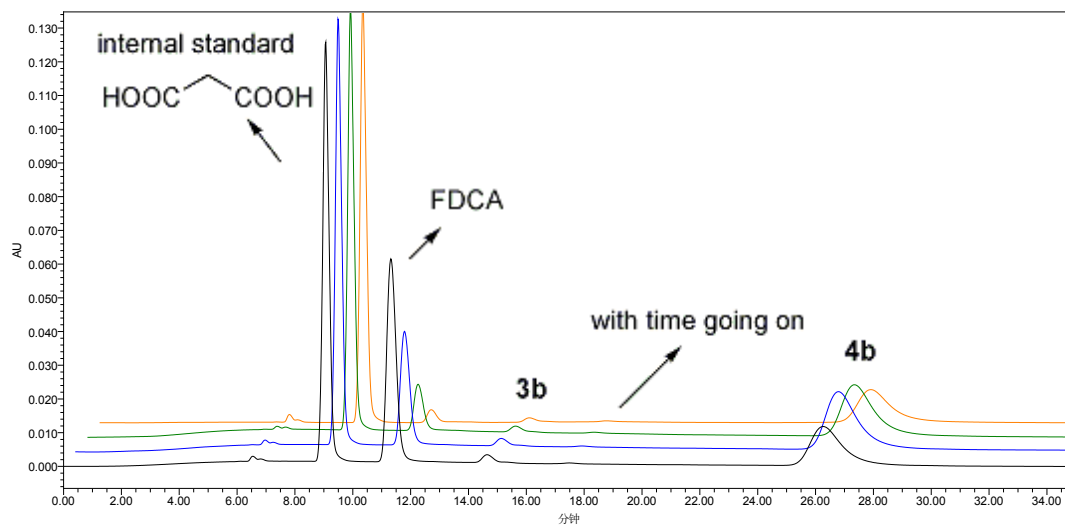

Figure S17. Changes of HPLC spectra of FDCA reaction with BG as a function of reaction time  
(The first samples were taken after 15 min, and then at 15-min intervals for 60 min).

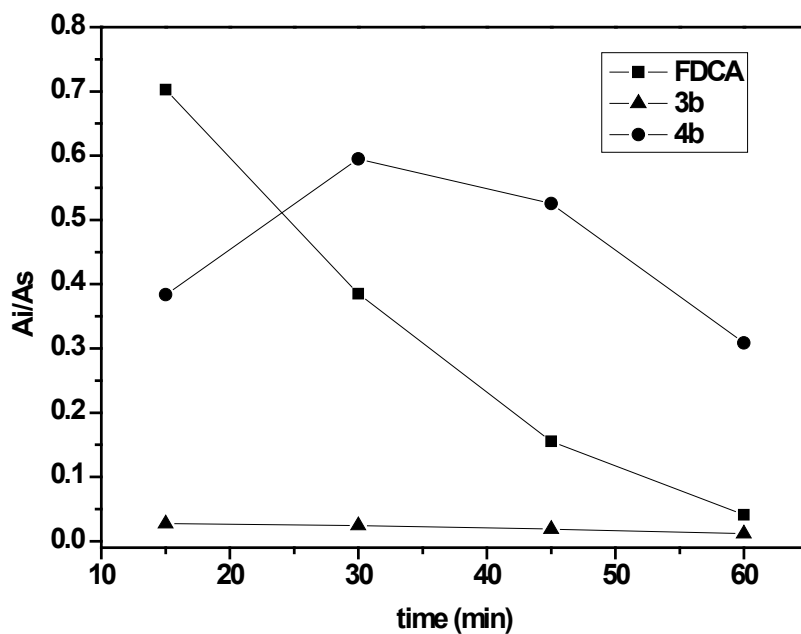

**Figure S18.** Plot of area ratio of FDCA, **3b** and **4b** to that of internal standard as a function of reaction time.

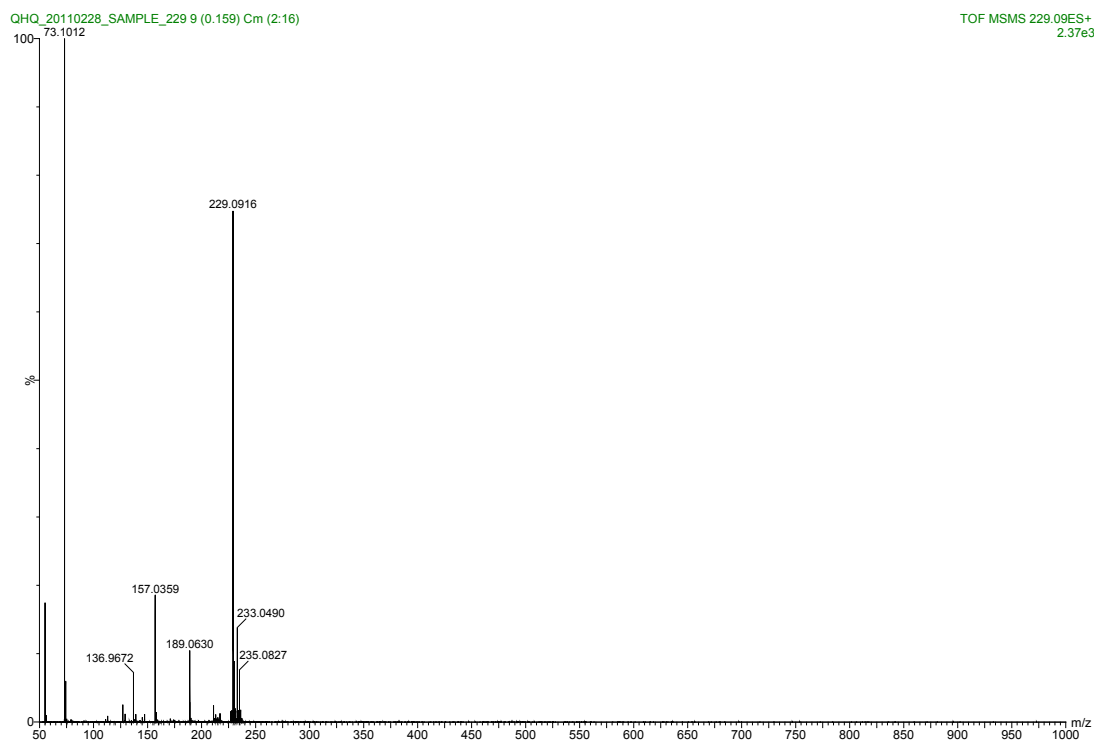

**Figure S19.** ESI-MS spectrum of **3b**.

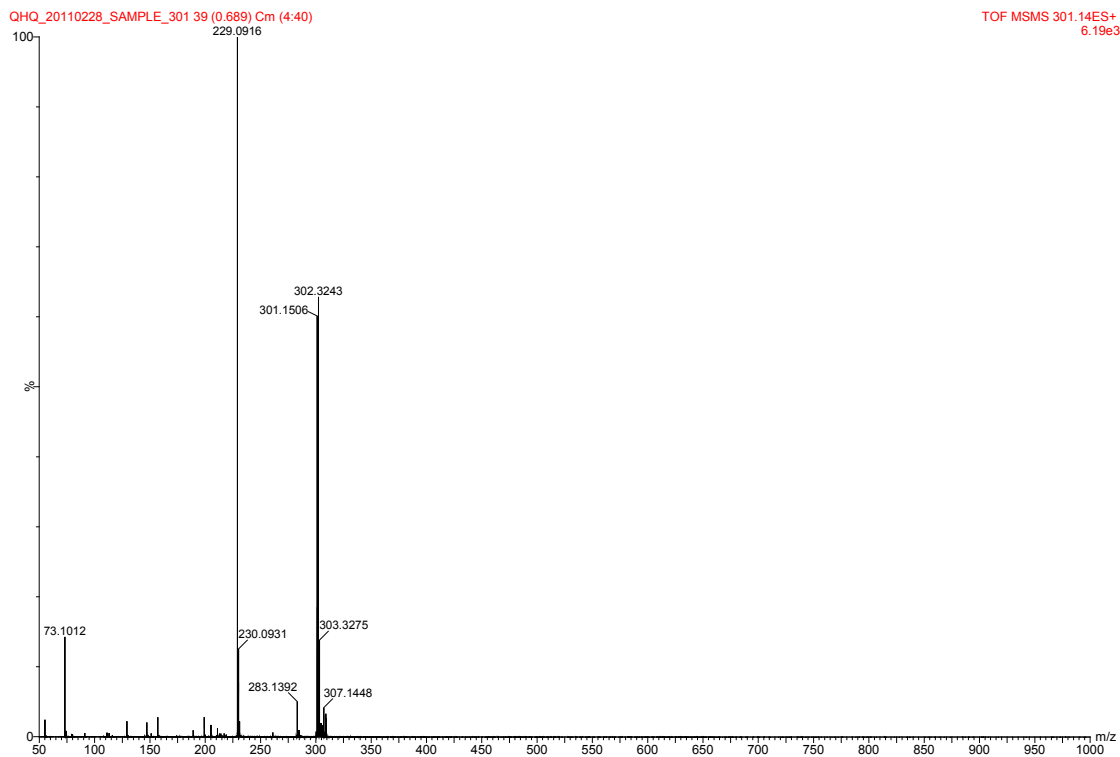

Figure S20. ESI-MS spectrum of 4b.

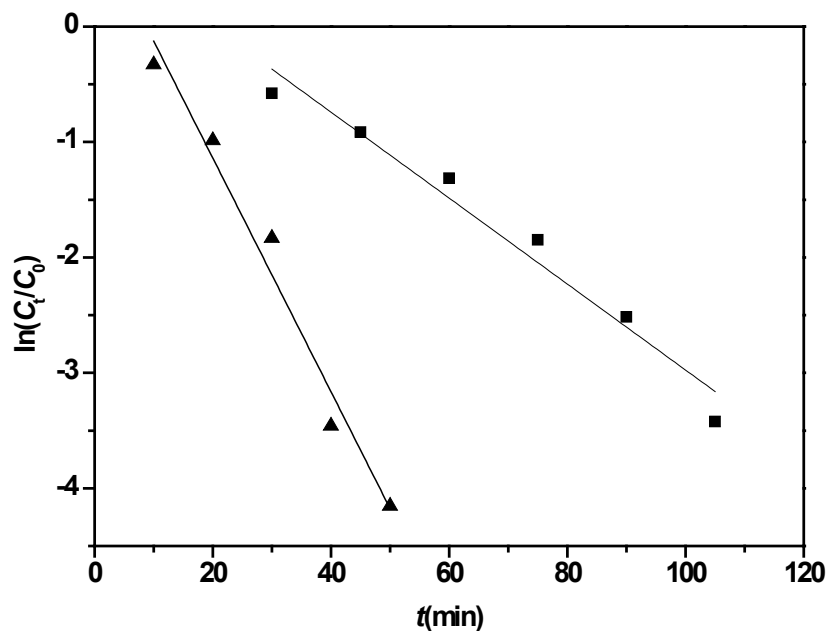

Figure S21. Relationship of  $\ln(C_t/C_0)$  and reaction time  $t$  of FDCA reacting with 1,3-trimethylene glycol (■) and 1,5-pentylene glycol (▲), respectively.  $C_t$  and  $C_0$  represent the concentration of FDCA at time  $t$  and at the beginning of the reaction, respectively.

#### 4. Thermal properties determination

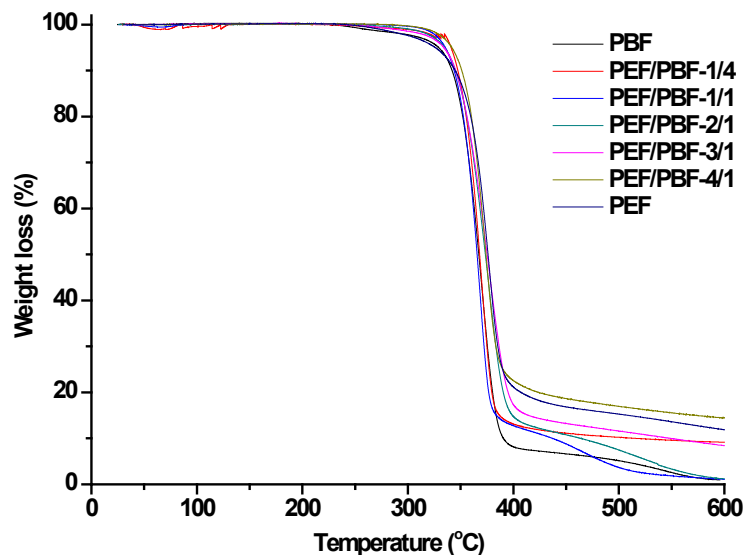

**Figure S22.** Thermogravimetric curves of as-prepared copolyesters. Conditions: sample was heated at a rate of 10 °C/min under nitrogen flow (25 mL/min).

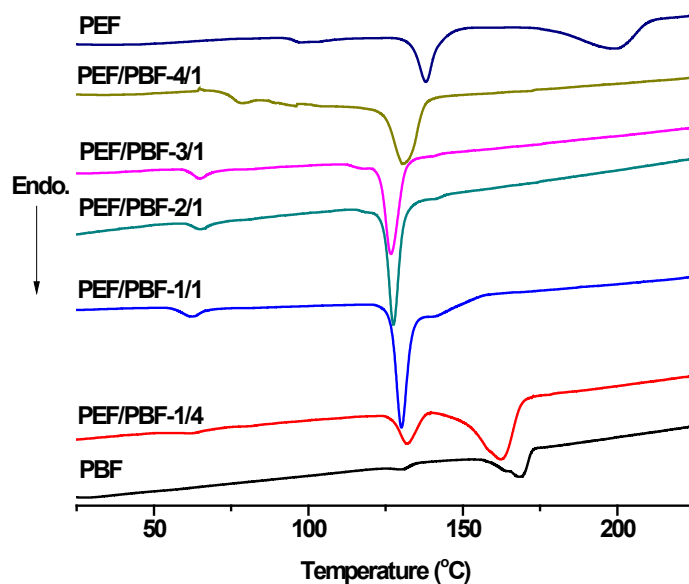

**Figure S23.** The first DSC heating traces of the as-prepared copolyesters. Conditions: the sample was heated at a rate of 40 °C/min under nitrogen flow (25 mL/min).

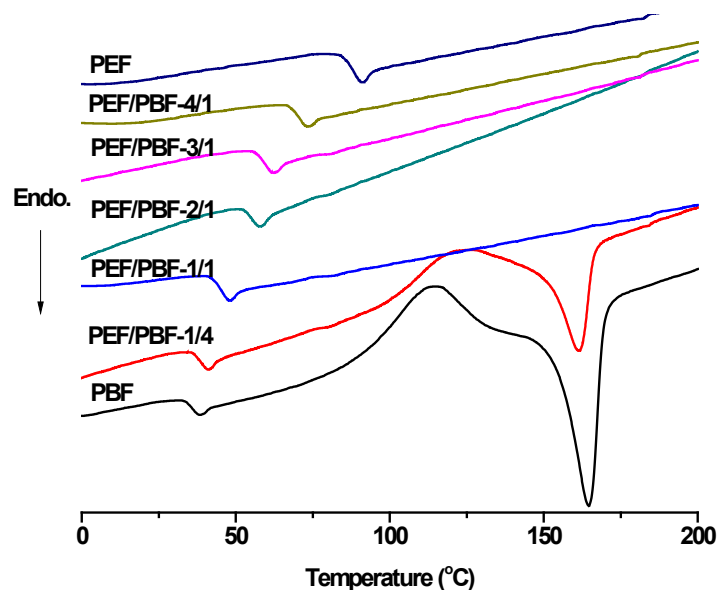

**Figure S24.** The second DSC heating traces of the as-prepared copolyesters. Conditions: the sample was heated at a rate of 40 °C/min under nitrogen flow (25 mL/min).

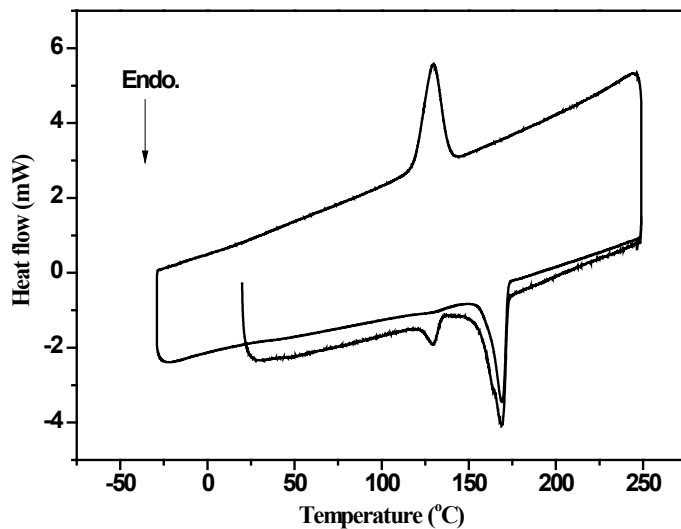

**Figure S25.** DSC traces of the as-prepared polyester PBF. Conditions: the sample was heated and cooled at a rate of 10 °C/min under nitrogen flow (25 mL/min).



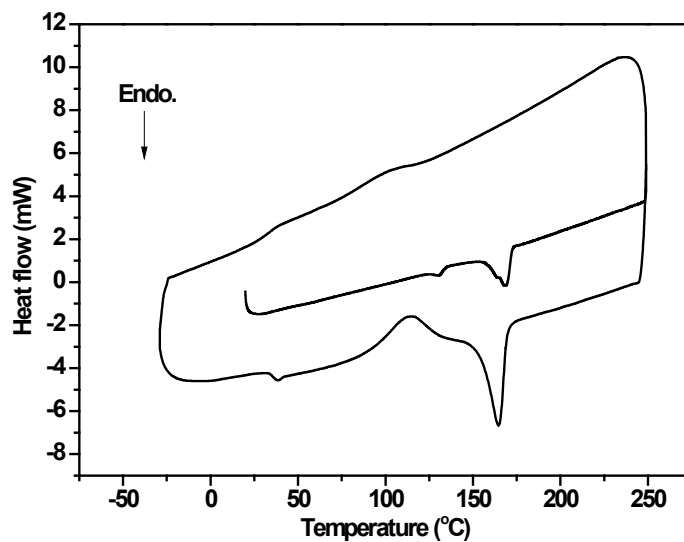

**Figure S26.** DSC traces of the as-prepared polyester PBF. Conditions: the sample was heated and cooled at a rate of 40 °C/min under nitrogen flow (25 mL/min).

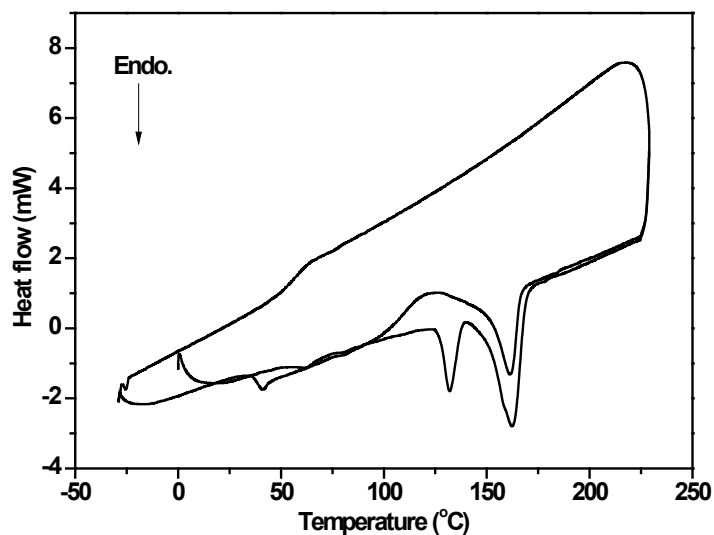

**Figure S27.** DSC traces of the as-prepared copolyester PEF/PBF-1/4. Conditions: the sample was heated and cooled at a rate of 40 °C/min under nitrogen flow (25 mL/min).

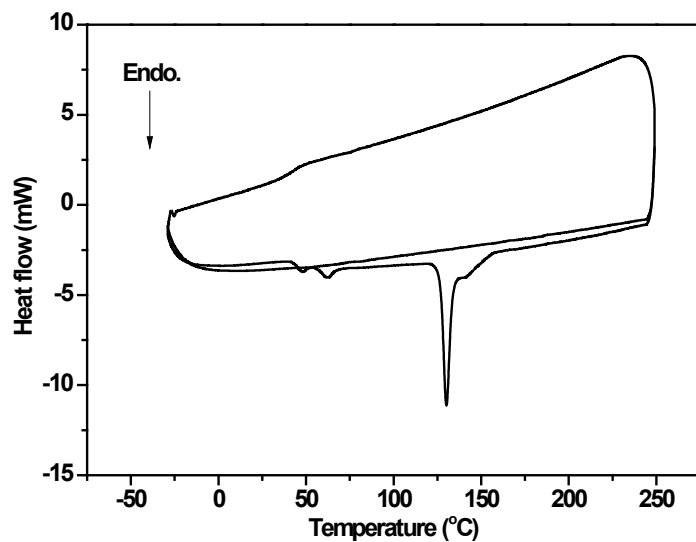

**Figure S28.** DSC traces of the as-prepared copolyester PEF/PBF-1/1. Conditions: the sample was heated and cooled at a rate of 40 °C/min under nitrogen flow (25 mL/min).

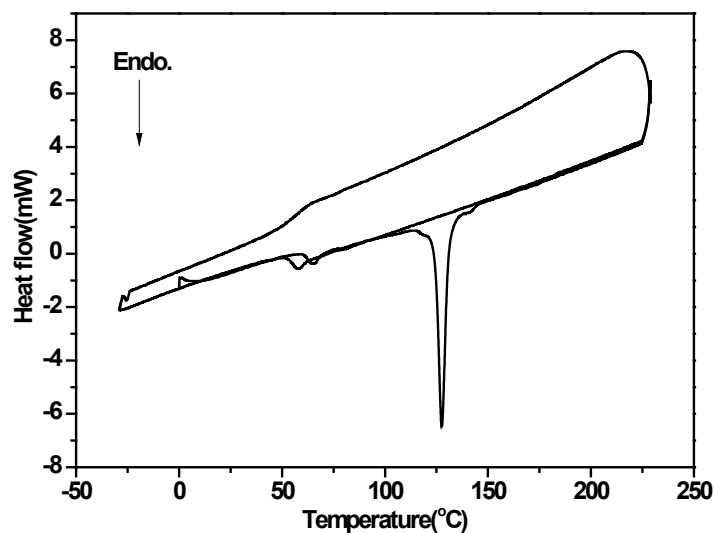

**Figure S29.** DSC traces of the as-prepared copolyester PEF/PBF-2/1. Conditions: the sample was heated and cooled at a rate of 40 °C/min under nitrogen flow (25 mL/min).

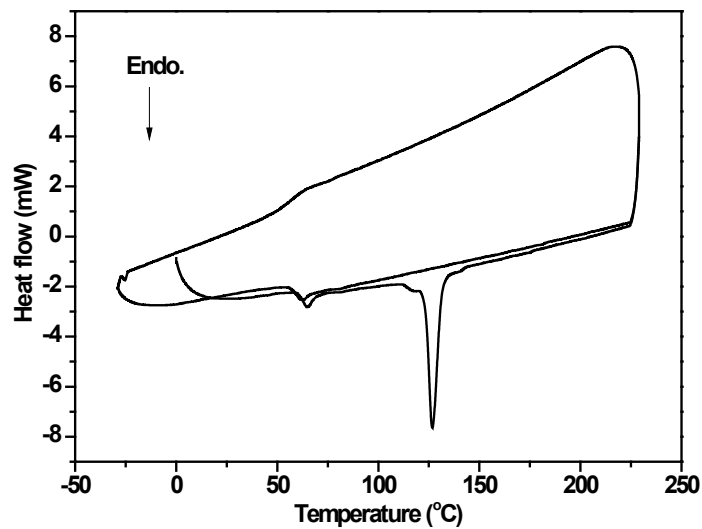

**Figure S30.** DSC traces of the as-prepared copolyester PEF/PBF-3/1. Conditions: the sample was heated and cooled at a rate of 40 °C/min under nitrogen flow (25 mL/min).

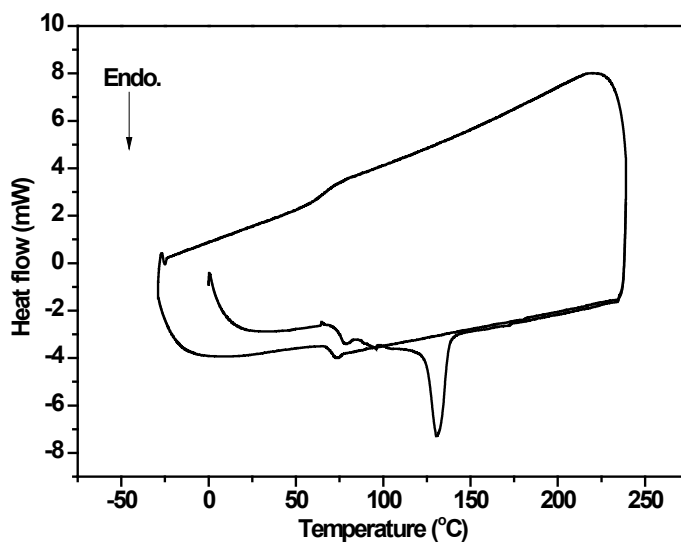

**Figure S31.** DSC traces of the as-prepared copolyester PEF/PBF-4/1. Conditions: the sample was heated and cooled at a rate of 40 °C/min under nitrogen flow (25 mL/min).

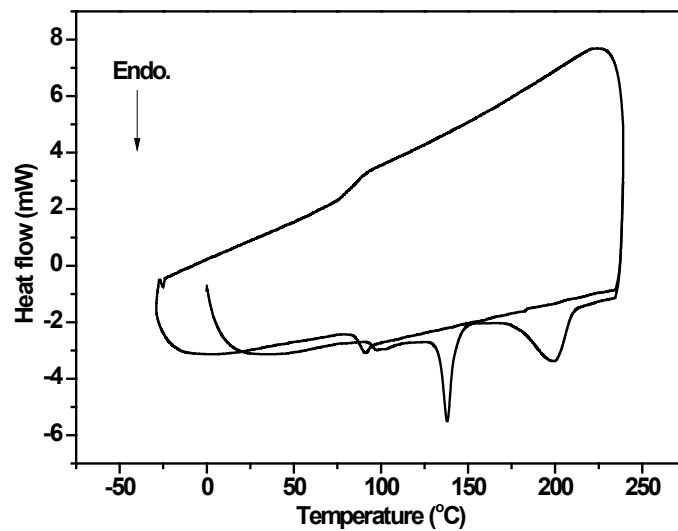

**Figure S32.** DSC traces of the as-prepared polyester PEF. Conditions: the sample was heated and cooled at a rate of 40 °C/min under nitrogen flow (25 mL/min).

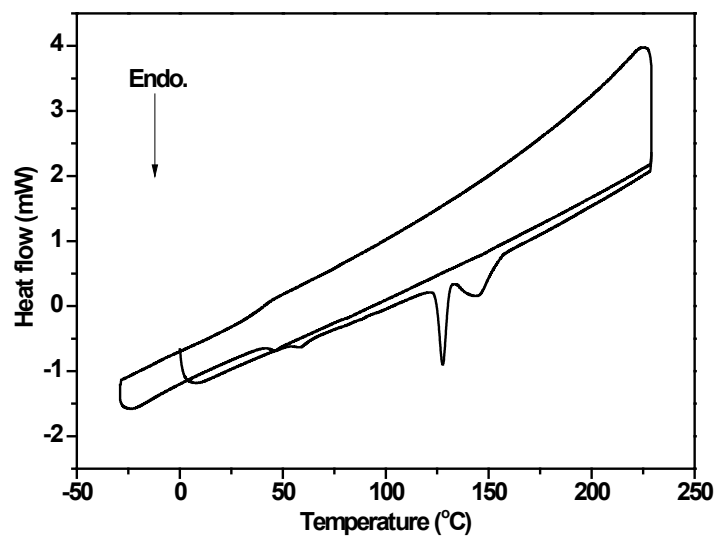

**Figure S33.** DSC traces of the as-prepared copolyester PEF/PBF-1/1. Conditions: the sample was heated and cooled at a rate of 10 °C/min under nitrogen flow (25 mL/min).
